# Supplementary material for: Combined Effects of Block-Based Programming and Physical Computing on Primary Students' Computational Thinking Skills
Source: Frontiers journal article supplement (doi:10.3389/fpsyg.2022.875382), 2022-06-08
Supplement: Data_Sheet_1.pdf [file Data_Sheet_1.pdf]

## Supplementary Material

### 1 SUPPLEMENTARY FIGURES

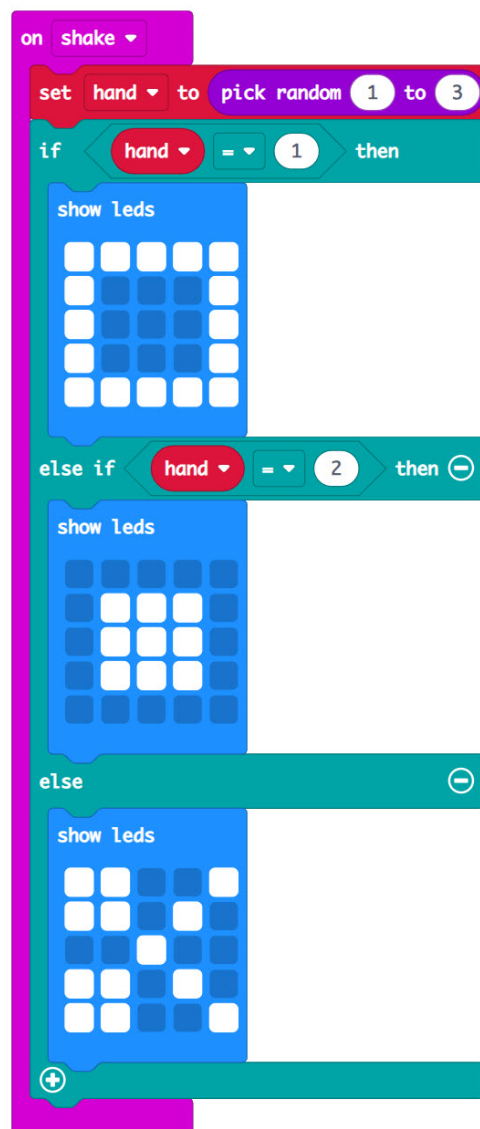

**Figure S1.** Rock-Paper-Scissors: Sample artifact for unit 3 with block-based Makecode programming environment. Source: Micro:bit Educational Foundation, 2022 , [https://makecode.microbit.org/\\_JR3MtvTrMFX4](https://makecode.microbit.org/_JR3MtvTrMFX4). Reproduced with permission.

25

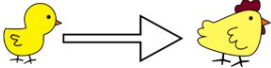

Take the chicken with his mother.

Meaning example:

 While the chicken is in a triangle, it **always** moves to the right.

Mark the correct sequence:

| A                                                                                 | B                                                                                  | C                                                                                   | D                                                                                   |
|-----------------------------------------------------------------------------------|------------------------------------------------------------------------------------|-------------------------------------------------------------------------------------|-------------------------------------------------------------------------------------|
|  |  |  |  |
|  |  |  |  |
|  |  |  |  |
|  |                                                                                    |  |  |



**Figure S2.** Sample question Q25 from BCTt assessing the program constructs *loops* (while) and *conditions* (always).  
Source: Zapata-Cáceres, M., Martín-Barroso, E., and Román-González, M. (2020). "Computational thinking test for beginners: design and content validation," in 2020 IEEE Global Engineering Education Conference (EDUCON) (Porto), 1905–1914. Reproduced with permission.

EXAMPLE, SET 2: SIMPLE LOOP

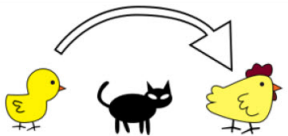

Take the chicken with his mother.  
Beware of the cat: don't go through its square.

Mark the correct sequence:

| A                                                                                      | B                                                                                       | C                                                                                        | D                                                                                        |
|----------------------------------------------------------------------------------------|-----------------------------------------------------------------------------------------|------------------------------------------------------------------------------------------|------------------------------------------------------------------------------------------|
| 1x  | 1x  | 2x  | 1x  |
| 2x  | 1x   | 2x  | 2x  |
|                                                                                        | 1x   |                                                                                          |                                                                                          |



**Figure S3.** Sample explanation upfront assessment questions 7-11 from BCTt assessing the program constructs – *simple loops*.  
Source: Zapata-Cáceres, M., Martín-Barroso, E., and Román-González, M. (2020). "Computational thinking test for beginners: design and content validation," in 2020 IEEE Global Engineering Education Conference (EDUCON) (Porto), 1905–1914. Reproduced with permission.
